# Supplementary material for: A cage compound precursor-derived Sb/Sb2O4/Fe3C nanocomposite anchored on reduced graphene oxide as an anode for potassium ion batteries
Source: Royal Society of Chemistry journal article supplement (doi:10.1039/d0nj05160h), 2020-12-10
Supplement: d0nj05160h1.pdf [file d0nj05160h1.pdf]

New Journal of Chemistry

Cage compound precursor-derived Sb/Sb<sub>2</sub>O<sub>4</sub>/Fe<sub>3</sub>C nanocomposite anchored on  
reduced graphene oxide as an anode for potassium ion batteries

Jianwen Wang<sup>a</sup>, Mengyang Cao<sup>a</sup>, Feng Xu<sup>a\*</sup>, Xiuli Zhu<sup>a</sup>, Khan Rashid<sup>a</sup>, Yan Wang<sup>b</sup>,

Lu Huang<sup>a\*</sup>

<sup>a</sup> *State Key Laboratory of Chem/Bio-Sensing and Chemometrics, Provincial Hunan Key Laboratory for Graphene Materials and Devices, College of Chemistry and Chemical Engineering, Hunan University, Changsha, 410082, P. R. China.*

<sup>b</sup> *Shenzhen Broad New Energy Technology Co., Ltd. Building B, Wisdom Plaza, Qiaoxiang Road, Shenzhen, Guangdong, 518053, P. R. China.*

\*Corresponding authors. E-mail address: [feng\\_xu@hnu.edu.cn](mailto:feng_xu@hnu.edu.cn) & [luhuang@hnu.edu.cn](mailto:luhuang@hnu.edu.cn)

## Materials

The rac-K<sub>2</sub>Sb<sub>2</sub> (tartrate)<sub>2</sub> (C<sub>8</sub>H<sub>10</sub>K<sub>2</sub>O<sub>15</sub>Sb<sub>2</sub>, AR), ferric sulfate (Fe<sub>2</sub>(SO<sub>4</sub>)<sub>3</sub>, AR), chromium nitrate (Cr(NO<sub>3</sub>)<sub>3</sub>, AR), sodium acetate (CH<sub>3</sub>COONa, AR), acetic acid (CH<sub>3</sub>COOH, AR), ethanol (CH<sub>3</sub>CH<sub>2</sub>OH, AR), deionized water (H<sub>2</sub>O, AR), graphite (1 wt. equiv., AR), sodium nitrate (NaNO<sub>3</sub>, AR), sulfuric acid (H<sub>2</sub>SO<sub>4</sub>, 95%~98%), potassium permanganate (KMnO<sub>4</sub>, AR), hydrogen peroxide (H<sub>2</sub>O<sub>2</sub>, AR), hydrogen chloride (HCl, AR) were purchased from Sinopharm Chemical Reagent Co., Ltd. All reagents were used directly without any further purification.

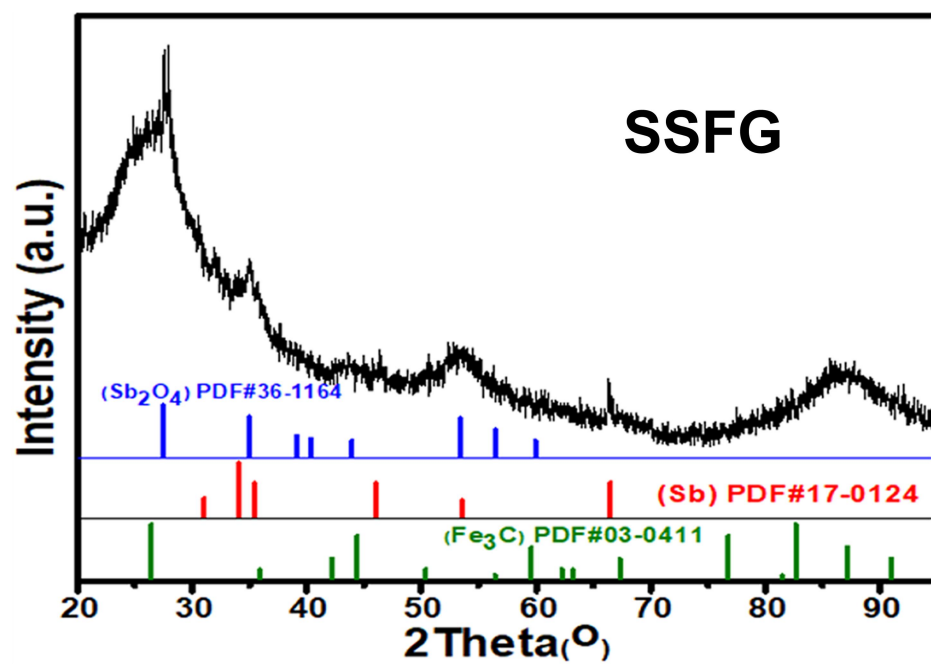

Fig. S1 The XRD pattern of SSFG.

| Element Number | Element Symbol | Element Name | Atomic Conc. | Weight Conc. |
|----------------|----------------|--------------|--------------|--------------|
| 6              | C              | Carbon       | 68.65        | 34.94        |
| 8              | O              | Oxygen       | 19.97        | 13.54        |
| 51             | Sb             | Antimony     | 8.79         | 45.38        |
| 26             | Fe             | Iron         | 2.59         | 6.14         |

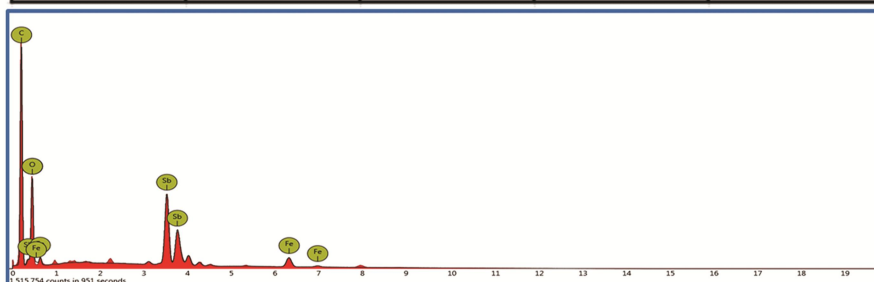

**Fig. S2** The EDS spectrum of the sample SSFG.

| Element Number | Element Symbol | Element Name | Weight Conc. |
|----------------|----------------|--------------|--------------|
| 6              | C              | Carbon       | 20.73        |
| 8              | O              | Oxygen       | 19.32        |
| 51             | Sb             | Antimony     | 56.62        |
| 26             | Fe             | Iron         | 3.34         |

**Fig. S3** The element contents of Sb/Fe cage compound precursors.

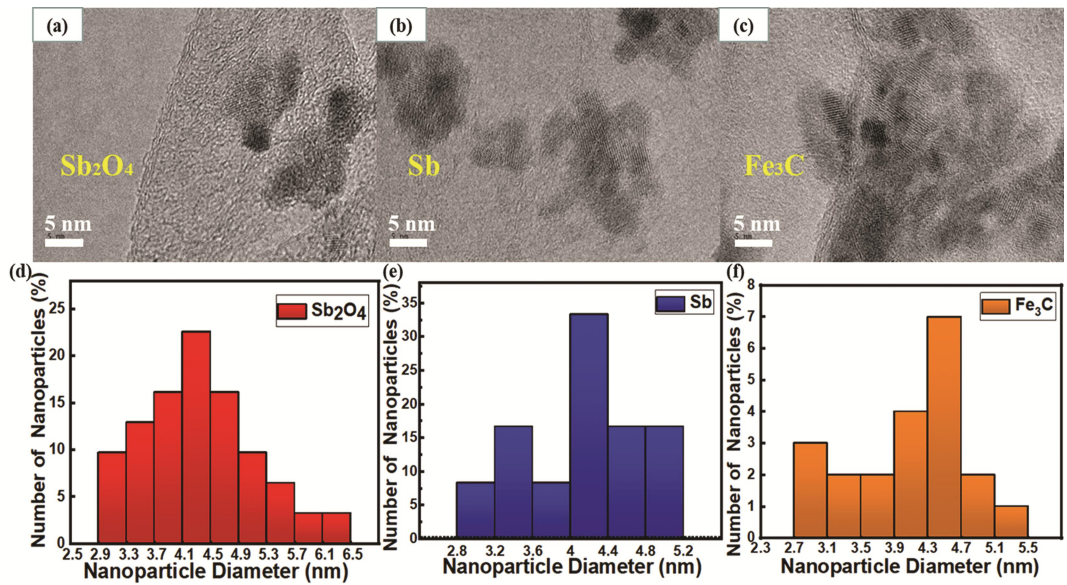

**Fig. S4** The size distribution of  $\text{Sb}_2\text{O}_4$ , Sb and  $\text{Fe}_3\text{C}$  in sample SSFG. (a-c) HRTEM of  $\text{Sb}_2\text{O}_4$ , Sb and  $\text{Fe}_3\text{C}$ ; (d-f) the size distributions of  $\text{Sb}_2\text{O}_4$ , Sb and  $\text{Fe}_3\text{C}$ .

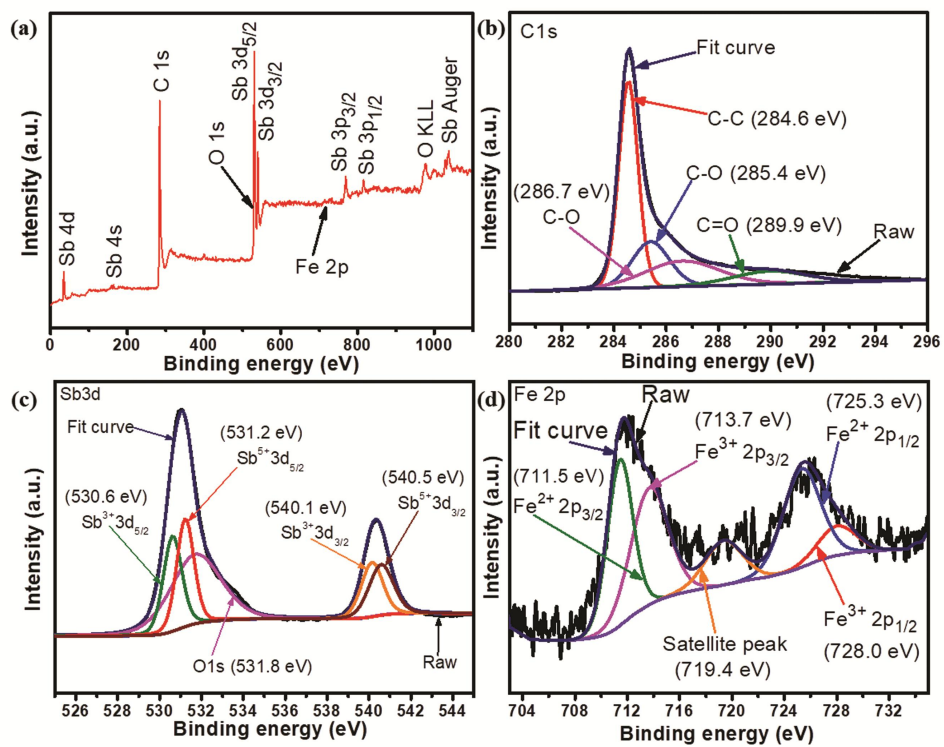

**Fig. S5** The (a) full spectrum and high resolution XPS spectrums of (b) C 1s, (c) Sb 3d and (d) Fe 2p orbits in SSFG.

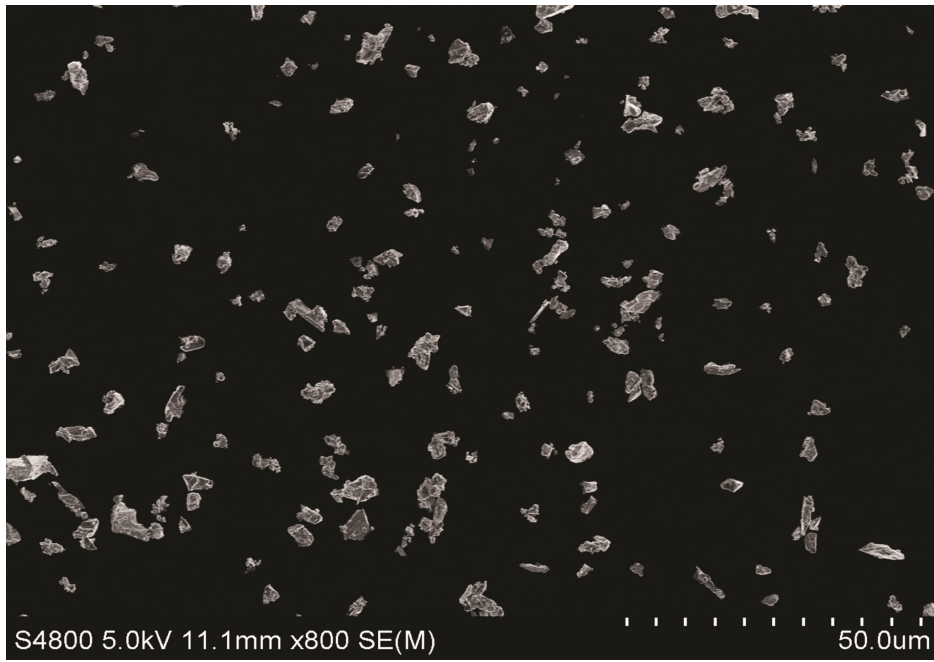

**Fig. S6** The SEM of the raw Sb powder.



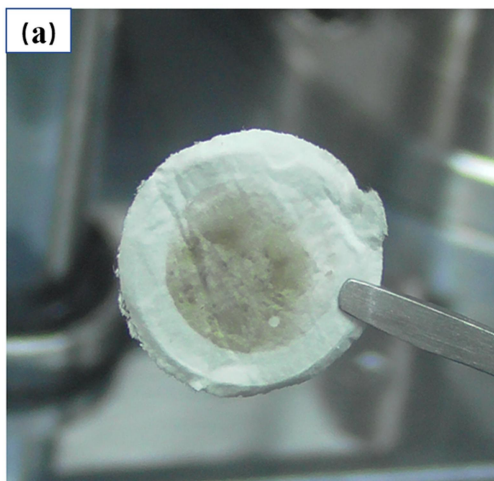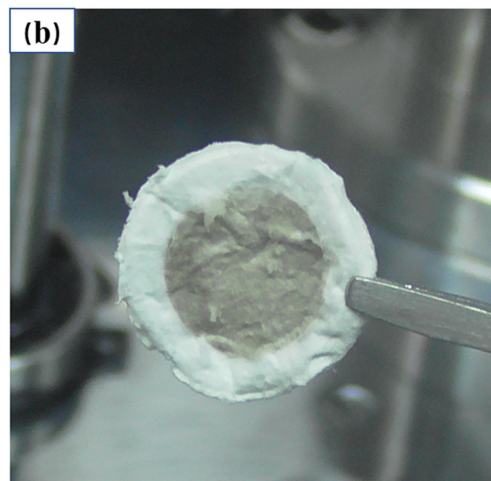

**Fig. S7** Digital photographs of separators after 1000 cycles at 1 A/g in KPF<sub>6</sub>-DME electrolyte of (a) SSFG and (b) Sb/rGO.
